# Supplementary material
Source: MDPI journal article supplement (https://www.mdpi.com/2071-1050/14/3/1673)
Supplement: s1 [file s1 › sustainability-1565010-supplementary.pdf]

# Long-Term Climatic Changes in Small Ruminant Farms in Greece and Potential Associations with Animal Health

Eleni I. Katsarou, Daphne T. Lianou, Elias Papadopoulos and George C. Fthenakis

**Table S1.** Annual average ( $\pm$  standard error of the mean) values of climatic parameters among locations of 444 small ruminant farms throughout Greece from 1989 to 2019.

| Year | Temperature at 2 m (°C) | Temperature of earth skin (°C) | Minimum temperature at 2 m (°C) | Maximum temperature at 2 m (°C) | Temperature range at 2 m (°C) | Relative humidity (%) | Precipitation (mm) | Wind speed at 10 m (m s <sup>-1</sup> ) |
|------|-------------------------|--------------------------------|---------------------------------|---------------------------------|-------------------------------|-----------------------|--------------------|-----------------------------------------|
| 1989 | 14.75 $\pm$ 0.27        | 15.26 $\pm$ 0.31               | -2.84 $\pm$ 0.61                | 34.67 $\pm$ 0.30                | 37.50 $\pm$ 0.79              | 66.5 $\pm$ 0.4        | 0.96 $\pm$ 0.02    | 2.49 $\pm$ 0.11                         |
| 1990 | 15.51 $\pm$ 0.26        | 16.04 $\pm$ 0.29               | -3.19 $\pm$ 0.70                | 35.62 $\pm$ 0.32                | 38.81 $\pm$ 0.89              | 64.4 $\pm$ 0.4        | 1.25 $\pm$ 0.04    | 2.43 $\pm$ 0.12                         |
| 1991 | 14.03 $\pm$ 0.29        | 14.54 $\pm$ 0.34               | -6.26 $\pm$ 0.79                | 34.95 $\pm$ 0.29                | 41.22 $\pm$ 0.94              | 70.5 $\pm$ 0.3        | 1.47 $\pm$ 0.03    | 2.49 $\pm$ 0.12                         |
| 1992 | 14.55 $\pm$ 0.27        | 15.04 $\pm$ 0.32               | -3.95 $\pm$ 0.61                | 35.67 $\pm$ 0.31                | 39.62 $\pm$ 0.78              | 66.1 $\pm$ 0.4        | 1.15 $\pm$ 0.02    | 2.58 $\pm$ 0.12                         |
| 1993 | 14.93 $\pm$ 0.27        | 15.47 $\pm$ 0.31               | -5.39 $\pm$ 0.81                | 37.88 $\pm$ 0.35                | 43.27 $\pm$ 1.03              | 64.8 $\pm$ 0.5        | 1.21 $\pm$ 0.04    | 2.57 $\pm$ 0.12                         |
| 1994 | 15.77 $\pm$ 0.26        | 16.18 $\pm$ 0.29               | -2.17 $\pm$ 0.62                | 38.89 $\pm$ 0.38                | 41.06 $\pm$ 0.87              | 67.3 $\pm$ 0.4        | 1.71 $\pm$ 0.04    | 2.52 $\pm$ 0.13                         |
| 1995 | 14.62 $\pm$ 0.29        | 15.18 $\pm$ 0.34               | -4.02 $\pm$ 0.85                | 34.76 $\pm$ 0.29                | 38.78 $\pm$ 0.96              | 69.5 $\pm$ 0.3        | 1.50 $\pm$ 0.05    | 2.52 $\pm$ 0.12                         |
| 1996 | 14.29 $\pm$ 0.29        | 14.83 $\pm$ 0.32               | -3.46 $\pm$ 0.64                | 37.21 $\pm$ 0.41                | 40.67 $\pm$ 0.94              | 71.3 $\pm$ 0.3        | 1.71 $\pm$ 0.05    | 2.50 $\pm$ 0.12                         |
| 1997 | 14.48 $\pm$ 0.28        | 15.07 $\pm$ 0.32               | -3.22 $\pm$ 0.65                | 38.06 $\pm$ 0.37                | 41.27 $\pm$ 0.92              | 68.0 $\pm$ 0.4        | 1.45 $\pm$ 0.03    | 2.59 $\pm$ 0.12                         |
| 1998 | 15.20 $\pm$ 0.28        | 15.71 $\pm$ 0.32               | -3.71 $\pm$ 0.66                | 39.47 $\pm$ 0.43                | 43.18 $\pm$ 0.96              | 68.3 $\pm$ 0.3        | 1.58 $\pm$ 0.03    | 2.56 $\pm$ 0.11                         |
| 1999 | 15.73 $\pm$ 0.28        | 16.21 $\pm$ 0.33               | -3.08 $\pm$ 0.69                | 38.99 $\pm$ 0.38                | 42.07 $\pm$ 0.98              | 69.5 $\pm$ 0.3        | 1.64 $\pm$ 0.04    | 2.46 $\pm$ 0.11                         |
| 2000 | 15.44 $\pm$ 0.26        | 16.00 $\pm$ 0.31               | -5.81 $\pm$ 0.83                | 40.60 $\pm$ 0.45                | 46.41 $\pm$ 1.12              | 65.7 $\pm$ 0.4        | 1.01 $\pm$ 0.03    | 2.49 $\pm$ 0.12                         |
| 2001 | 15.52 $\pm$ 0.28        | 16.11 $\pm$ 0.32               | -9.48 $\pm$ 1.14                | 37.21 $\pm$ 0.34                | 46.69 $\pm$ 1.36              | 67.2 $\pm$ 0.4        | 1.45 $\pm$ 0.04    | 2.68 $\pm$ 0.12                         |
| 2002 | 15.28 $\pm$ 0.29        | 15.72 $\pm$ 0.33               | -7.15 $\pm$ 0.82                | 37.31 $\pm$ 0.29                | 44.46 $\pm$ 0.98              | 71.2 $\pm$ 0.3        | 2.01 $\pm$ 0.04    | 2.39 $\pm$ 0.11                         |
| 2003 | 15.10 $\pm$ 0.29        | 15.66 $\pm$ 0.34               | -3.86 $\pm$ 0.65                | 38.24 $\pm$ 0.36                | 42.10 $\pm$ 0.85              | 70.1 $\pm$ 0.3        | 1.82 $\pm$ 0.04    | 2.59 $\pm$ 0.13                         |
| 2004 | 15.08 $\pm$ 0.29        | 15.60 $\pm$ 0.33               | -7.08 $\pm$ 0.65                | 36.79 $\pm$ 0.35                | 43.87 $\pm$ 0.88              | 69.9 $\pm$ 0.3        | 1.61 $\pm$ 0.05    | 2.55 $\pm$ 0.12                         |
| 2005 | 14.88 $\pm$ 0.28        | 15.46 $\pm$ 0.33               | -4.42 $\pm$ 0.73                | 37.16 $\pm$ 0.34                | 41.58 $\pm$ 0.95              | 70.0 $\pm$ 0.3        | 1.81 $\pm$ 0.06    | 2.51 $\pm$ 0.12                         |
| 2006 | 14.90 $\pm$ 0.27        | 15.34 $\pm$ 0.32               | -6.12 $\pm$ 0.78                | 38.58 $\pm$ 0.39                | 44.70 $\pm$ 1.07              | 70.2 $\pm$ 0.3        | 1.59 $\pm$ 0.04    | 2.48 $\pm$ 0.12                         |
| 2007 | 15.89 $\pm$ 0.26        | 16.31 $\pm$ 0.29               | -1.53 $\pm$ 0.63                | 41.12 $\pm$ 0.41                | 42.64 $\pm$ 0.92              | 66.9 $\pm$ 0.3        | 1.49 $\pm$ 0.03    | 2.45 $\pm$ 0.11                         |
| 2008 | 15.81 $\pm$ 0.26        | 16.32 $\pm$ 0.30               | -5.34 $\pm$ 0.61                | 37.67 $\pm$ 0.38                | 43.02 $\pm$ 0.86              | 67.9 $\pm$ 0.3        | 1.31 $\pm$ 0.04    | 2.49 $\pm$ 0.11                         |
| 2009 | 15.60 $\pm$ 0.28        | 16.02 $\pm$ 0.32               | -2.24 $\pm$ 0.62                | 39.19 $\pm$ 0.45                | 41.43 $\pm$ 0.96              | 70.5 $\pm$ 0.3        | 1.97 $\pm$ 0.06    | 2.46 $\pm$ 0.12                         |

|      |                  |                  |                  |                  |                  |                |                 |                 |
|------|------------------|------------------|------------------|------------------|------------------|----------------|-----------------|-----------------|
| 2010 | $15.91 \pm 0.30$ | $16.37 \pm 0.34$ | $-3.61 \pm 0.67$ | $37.31 \pm 0.32$ | $40.92 \pm 0.87$ | $70.6 \pm 0.3$ | $1.85 \pm 0.05$ | $2.49 \pm 0.12$ |
| 2011 | $15.05 \pm 0.27$ | $15.62 \pm 0.32$ | $-3.31 \pm 0.59$ | $37.38 \pm 0.37$ | $40.69 \pm 0.86$ | $68.2 \pm 0.3$ | $1.39 \pm 0.04$ | $2.53 \pm 0.12$ |
| 2012 | $16.05 \pm 0.27$ | $16.58 \pm 0.32$ | $-4.76 \pm 0.71$ | $39.84 \pm 0.44$ | $44.60 \pm 1.00$ | $66.6 \pm 0.4$ | $1.68 \pm 0.04$ | $2.60 \pm 0.12$ |
| 2013 | $15.97 \pm 0.26$ | $16.41 \pm 0.31$ | $-2.68 \pm 0.58$ | $36.41 \pm 0.36$ | $39.10 \pm 0.87$ | $68.1 \pm 0.3$ | $1.50 \pm 0.04$ | $2.53 \pm 0.13$ |
| 2014 | $15.89 \pm 0.28$ | $16.41 \pm 0.33$ | $-1.66 \pm 0.75$ | $36.59 \pm 0.31$ | $38.25 \pm 0.87$ | $71.5 \pm 0.3$ | $1.91 \pm 0.06$ | $2.36 \pm 0.11$ |
| 2015 | $15.64 \pm 0.27$ | $16.05 \pm 0.33$ | $-4.96 \pm 0.72$ | $37.46 \pm 0.31$ | $42.43 \pm 0.93$ | $70.3 \pm 0.3$ | $1.74 \pm 0.04$ | $2.49 \pm 0.12$ |
| 2016 | $15.93 \pm 0.27$ | $16.43 \pm 0.32$ | $-3.50 \pm 0.65$ | $37.45 \pm 0.37$ | $40.95 \pm 0.86$ | $68.2 \pm 0.3$ | $1.56 \pm 0.06$ | $2.51 \pm 0.12$ |
| 2017 | $15.75 \pm 0.26$ | $16.28 \pm 0.31$ | $-6.88 \pm 0.84$ | $39.73 \pm 0.41$ | $46.61 \pm 1.09$ | $66.4 \pm 0.3$ | $1.55 \pm 0.04$ | $2.46 \pm 0.11$ |
| 2018 | $16.21 \pm 0.27$ | $16.63 \pm 0.32$ | $-2.14 \pm 0.67$ | $35.64 \pm 0.34$ | $37.78 \pm 0.82$ | $69.9 \pm 0.3$ | $1.78 \pm 0.05$ | $2.49 \pm 0.11$ |
| 2019 | $16.23 \pm 0.25$ | $16.73 \pm 0.29$ | $-4.60 \pm 0.76$ | $37.23 \pm 0.32$ | $41.83 \pm 0.98$ | $68.4 \pm 0.3$ | $0.96 \pm 0.02$ | $2.43 \pm 0.12$ |

---

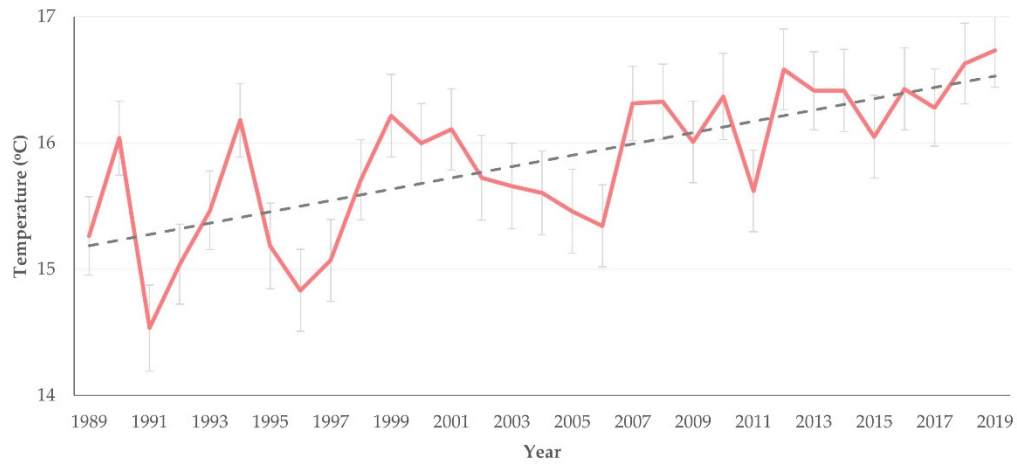

**Figure S1.** Annual average temperature of Earth skin from 1989 to 2019 among locations of 444 small ruminant farms throughout Greece (dashed line is the respective trendline; slope: 0.044,  $p < 0.0001$ ).

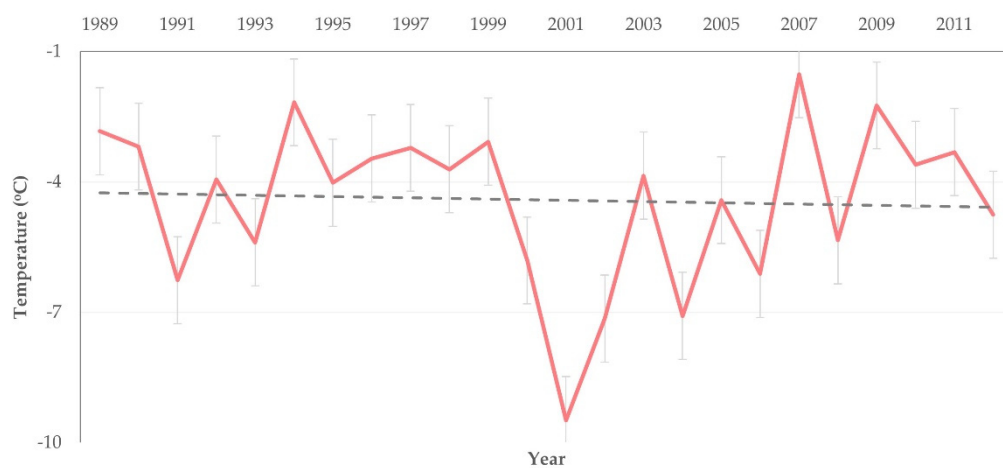

**Figure S2.** Annual average annual minimum temperature at 2 m from 1989 to 2019 among locations of 444 small ruminant farms throughout Greece (dashed line is the respective trendline; slope: 0.011,  $p = 0.77$ ).

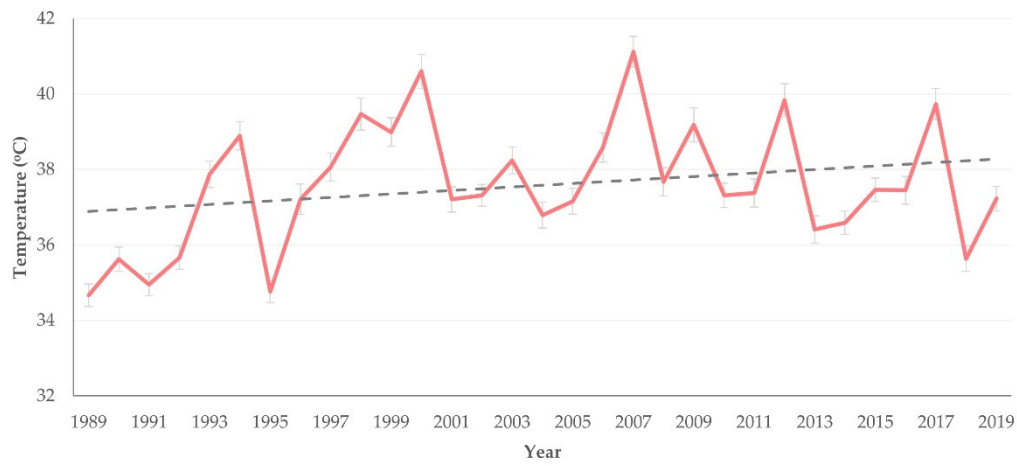

**Figure S3.** Annual average annual maximum temperature at 2 m from 1989 to 2019 among locations of 444 small ruminant farms throughout Greece (dashed line is the respective trendline; slope: 0.046,  $p = 0.17$ ).

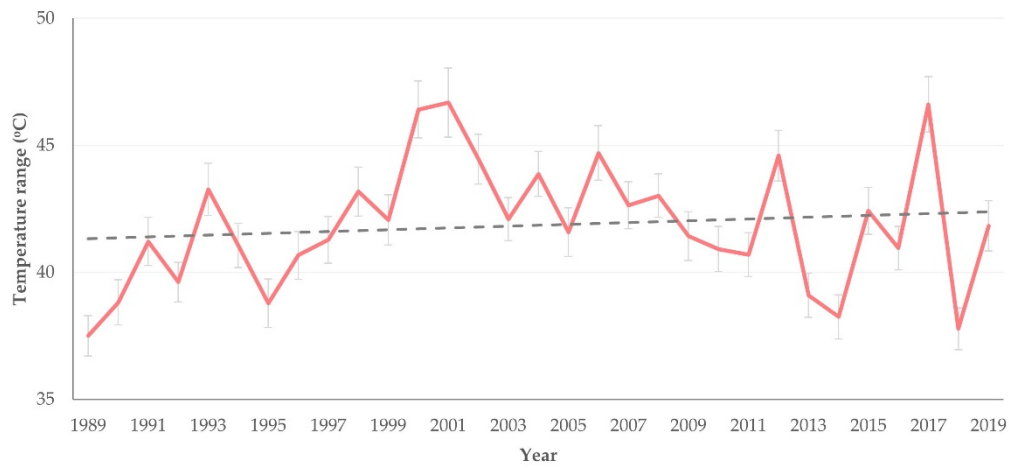

**Figure S4.** Annual average range of temperature at 2 m from 1989 to 2019 among locations of 444 small ruminant farms throughout Greece (dashed line is the respective trendline; slope: 0.035,  $p = 0.49$ ).

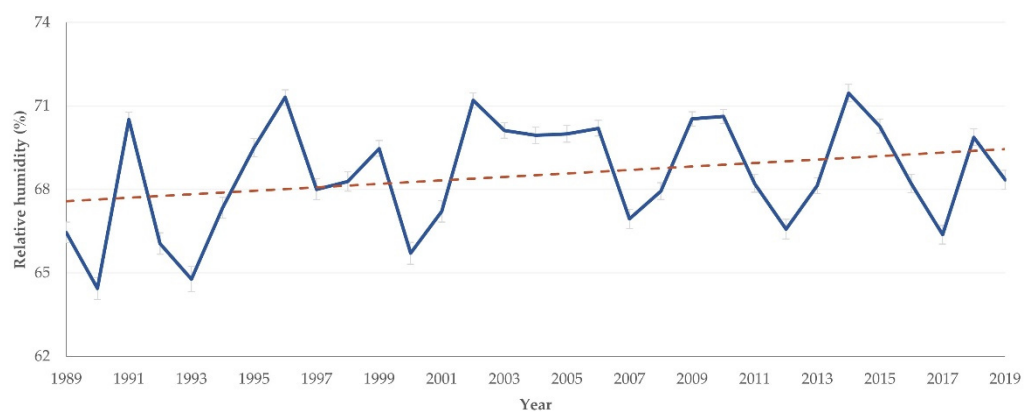

**Figure S5.** Annual average relative humidity at 2 m from 1989 to 2019 among locations of 444 small ruminant farms throughout Greece (dashed line is the respective trendline; slope: 0.062,  $p = 0.12$ ).

**Table S2.** Average ( $\pm$  standard error of the mean) overall values of climatic parameters from 1989 to 2019 among locations of 444 small ruminant farms throughout Greece, in accord with the part of the country.

| Part of the country   | Temperature<br>at 2 m ( $^{\circ}\text{C}$ ) | Temperature<br>of earth skin ( $^{\circ}\text{C}$ ) | Minimum<br>tempe-<br>rature at 2 m ( $^{\circ}\text{C}$ ) | Maximum<br>tempe-<br>rature at 2 m ( $^{\circ}\text{C}$ ) | Temperature<br>range at 2 m ( $^{\circ}\text{C}$ ) | Relative<br>humidity (%) | Precipitation<br>(mm) | Wind speed<br>at 10 m ( $\text{m s}^{-1}$ ) |
|-----------------------|----------------------------------------------|-----------------------------------------------------|-----------------------------------------------------------|-----------------------------------------------------------|----------------------------------------------------|--------------------------|-----------------------|---------------------------------------------|
| Central ( $n = 163$ ) | $15.58 \pm 0.11$                             | $15.92 \pm 0.10$                                    | $-4.28 \pm 0.38$                                          | $39.22 \pm 0.31$                                          | $43.50 \pm 0.50$                                   | $67.6 \pm 0.4$           | $1.60 \pm 0.05$       | $2.22 \pm 0.01$                             |
| Islands ( $n = 59$ )  | $18.48 \pm 0.09$                             | $19.70 \pm 0.09$                                    | $4.84 \pm 0.22$                                           | $32.68 \pm 0.18$                                          | $27.84 \pm 0.28$                                   | $71.7 \pm 0.2$           | $1.52 \pm 0.05$       | $4.30 \pm 0.02$                             |
| North ( $n = 123$ )   | $13.44 \pm 0.12$                             | $13.62 \pm 0.11$                                    | $-9.38 \pm 0.45$                                          | $37.79 \pm 0.34$                                          | $47.17 \pm 0.56$                                   | $68.0 \pm 0.4$           | $1.57 \pm 0.06$       | $1.87 \pm 0.01$                             |
| South ( $n = 99$ )    | $16.03 \pm 0.10$                             | $16.72 \pm 0.10$                                    | $-2.16 \pm 0.26$                                          | $38.45 \pm 0.31$                                          | $40.61 \pm 0.42$                                   | $68.3 \pm 0.3$           | $1.55 \pm 0.05$       | $2.67 \pm 0.01$                             |

**Table S3.** Slope ( $\pm$  standard error of the mean) in change of the annual values of climatic parameters from 1989 to 2019 among locations of 444 small ruminant farms throughout Greece, in accord with the part of the country.

| Part of the country              | Temperature at 2 m (°C) | Temperature of earth skin (°C) | Minimum temperature at 2 m (°C) | Maximum temperature at 2 m (°C) | Temperature range at 2 m (°C) | Relative humidity (%) | Precipitation (mm) | Wind speed at 10 m (m s <sup>-1</sup> ) |
|----------------------------------|-------------------------|--------------------------------|---------------------------------|---------------------------------|-------------------------------|-----------------------|--------------------|-----------------------------------------|
| Changes for the period 1989-2019 |                         |                                |                                 |                                 |                               |                       |                    |                                         |
| Central ( <i>n</i> = 163)        | 0.045 $\pm$ 0.009       | 0.041 $\pm$ 0.008              | 0.006 $\pm$ 0.044               | 0.048 $\pm$ 0.034               | 0.042 $\pm$ 0.057             | 0.069 $\pm$ 0.041     | 0.018 $\pm$ 0.005  | -0.001 $\pm$ 0.001                      |
| Islands ( <i>n</i> = 59)         | 0.043 $\pm$ 0.007       | 0.040 $\pm$ 0.008              | 0.013 $\pm$ 0.026               | 0.031 $\pm$ 0.020               | 0.017 $\pm$ 0.032             | 0.004 $\pm$ 0.018     | 0.006 $\pm$ 0.005  | -0.002 $\pm$ 0.002                      |
| North ( <i>n</i> = 123)          | 0.053 $\pm$ 0.010       | 0.047 $\pm$ 0.001              | 0.025 $\pm$ 0.052               | 0.044 $\pm$ 0.038               | 0.020 $\pm$ 0.064             | 0.090 $\pm$ 0.049     | 0.018 $\pm$ 0.005  | -0.003 $\pm$ 0.002                      |
| South ( <i>n</i> = 99)           | 0.041 $\pm$ 0.009       | 0.036 $\pm$ 0.009              | -0.004 $\pm$ 0.029              | 0.058 $\pm$ 0.034               | 0.062 $\pm$ 0.046             | 0.050 $\pm$ 0.038     | 0.014 $\pm$ 0.005  | 0.002 $\pm$ 0.002                       |
| Changes for the period 2014-2019 |                         |                                |                                 |                                 |                               |                       |                    |                                         |
| Central ( <i>n</i> = 163)        | 0.067 $\pm$ 0.041       | 0.013 $\pm$ 0.047              | -0.409 $\pm$ 0.553              | -0.068 $\pm$ 0.360              | 0.341 $\pm$ 0.897             | -0.356 $\pm$ 0.420    | 0.041 $\pm$ 0.030  | 0.019 $\pm$ 0.010                       |
| Islands ( <i>n</i> = 59)         | 0.052 $\pm$ 0.069       | -0.148 $\pm$ 0.124             | -0.173 $\pm$ 0.459              | -0.137 $\pm$ 0.187              | 0.036 $\pm$ 0.585             | -0.143 $\pm$ 0.240    | 0.055 $\pm$ 0.055  | 0.016 $\pm$ 0.029                       |
| North ( <i>n</i> = 123)          | 0.166 $\pm$ 0.039       | 0.150 $\pm$ 0.039              | -0.209 $\pm$ 0.599              | 0.134 $\pm$ 0.443               | 0.343 $\pm$ 1.038             | -1.060 $\pm$ 0.467    | -0.100 $\pm$ 0.048 | 0.016 $\pm$ 0.010                       |
| South ( <i>n</i> = 99)           | 0.033 $\pm$ 0.054       | -0.070 $\pm$ 0.083             | -0.281 $\pm$ 0.385              | -0.036 $\pm$ 0.410              | 0.245 $\pm$ 0.752             | -0.161 $\pm$ 0.420    | 0.082 $\pm$ 0.051  | 0.030 $\pm$ 0.016                       |

**Table S4.** Slope ( $\pm$  standard error of the mean) in change of the annual values of climatic parameters from 1989 to 2019 among locations of 444 small ruminant farms throughout Greece, in accord with the management system applied on the farms.

| Management System<br>Applied in Farms | Temperature<br>at 2 m ( $^{\circ}\text{C}$ ) | Temperature<br>of earth skin ( $^{\circ}\text{C}$ ) | Minimum<br>tempe-<br>rature at 2 m ( $^{\circ}\text{C}$ ) | Maximum<br>tempe-<br>rature at 2 m ( $^{\circ}\text{C}$ ) | Temperature<br>range at 2 m ( $^{\circ}\text{C}$ ) | Relative<br>humidity (%) | Precipitation<br>(mm) | Wind speed<br>at 10 m ( $\text{m s}^{-1}$ ) |
|---------------------------------------|----------------------------------------------|-----------------------------------------------------|-----------------------------------------------------------|-----------------------------------------------------------|----------------------------------------------------|--------------------------|-----------------------|---------------------------------------------|
| Changes for the period 1989-2019      |                                              |                                                     |                                                           |                                                           |                                                    |                          |                       |                                             |
| Intensive ( $n = 52$ )                | $0.047 \pm 0.009$                            | $0.044 \pm 0.009$                                   | $0.011 \pm 0.043$                                         | $0.046 \pm 0.034$                                         | $0.035 \pm 0.056$                                  | $0.069 \pm 0.043$        | $0.016 \pm 0.005$     | $-0.002 \pm 0.001$                          |
| Semi-intensive ( $n = 180$ )          | $0.047 \pm 0.009$                            | $0.044 \pm 0.009$                                   | $0.012 \pm 0.041$                                         | $0.048 \pm 0.035$                                         | $0.036 \pm 0.055$                                  | $0.073 \pm 0.043$        | $0.017 \pm 0.005$     | $-0.001 \pm 0.001$                          |
| Semi-extensive ( $n = 168$ )          | $0.046 \pm 0.008$                            | $0.045 \pm 0.008$                                   | $0.009 \pm 0.036$                                         | $0.046 \pm 0.031$                                         | $0.037 \pm 0.048$                                  | $0.055 \pm 0.036$        | $0.016 \pm 0.005$     | $-0.001 \pm 0.001$                          |
| Extensive ( $n = 44$ )                | $0.044 \pm 0.008$                            | $0.044 \pm 0.008$                                   | $0.008 \pm 0.032$                                         | $0.045 \pm 0.028$                                         | $0.037 \pm 0.043$                                  | $0.047 \pm 0.032$        | $0.014 \pm 0.005$     | $-0.002 \pm 0.002$                          |
| Changes for the period 2014-2019      |                                              |                                                     |                                                           |                                                           |                                                    |                          |                       |                                             |
| Intensive ( $n = 52$ )                | $0.087 \pm 0.044$                            | $0.084 \pm 0.053$                                   | $-0.328 \pm 0.542$                                        | $-0.056 \pm 0.387$                                        | $0.272 \pm 0.910$                                  | $-0.529 \pm 0.431$       | $0.002 \pm 0.034$     | $0.019 \pm 0.010$                           |
| Semi-intensive ( $n = 180$ )          | $0.105 \pm 0.041$                            | $0.108 \pm 0.048$                                   | $-0.314 \pm 0.514$                                        | $0.019 \pm 0.391$                                         | $0.333 \pm 0.891$                                  | $-0.617 \pm 0.427$       | $-0.009 \pm 0.040$    | $0.019 \pm 0.009$                           |
| Semi-extensive ( $n = 168$ )          | $0.082 \pm 0.044$                            | $0.078 \pm 0.045$                                   | $-0.263 \pm 0.501$                                        | $-0.022 \pm 0.343$                                        | $0.241 \pm 0.832$                                  | $-0.451 \pm 0.391$       | $0.015 \pm 0.042$     | $0.020 \pm 0.013$                           |
| Extensive ( $n = 44$ )                | $0.066 \pm 0.052$                            | $0.057 \pm 0.049$                                   | $-0.277 \pm 0.499$                                        | $-0.074 \pm 0.307$                                        | $0.203 \pm 0.760$                                  | $-0.282 \pm 0.360$       | $0.040 \pm 0.043$     | $0.020 \pm 0.018$                           |

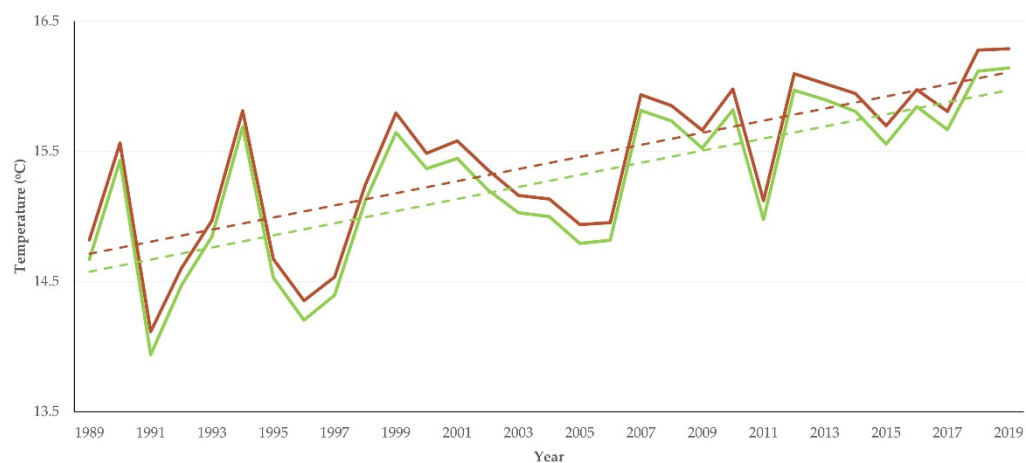

**Figure S6.** Annual average temperature at 2 m from 1989 to 2019 among locations of 444 small ruminant farms throughout Greece, in accord with the animal species farmed in the respective locations (brown: goats, green: sheep; dashed lines are respective trend-lines).

**Table S5.** Annual frequency of cases (a) pregnancy toxaemia, (b) clinical mastitis and (c) neonatal hypothermia in small ruminants, from 1989 to 2019, attended at the Department of Obstetrics and Reproduction of the Veterinary Faculty of the University of Thessaly.

| Year | No. of cases       |                   |                      |
|------|--------------------|-------------------|----------------------|
|      | Pregnancy toxaemia | Clinical mastitis | Neonatal hypothermia |
| 1999 | 5                  | 7                 | 12                   |
| 2000 | 7                  | 7                 | 16                   |
| 2001 | 12                 | 9                 | 15                   |
| 2002 | 10                 | 7                 | 23                   |
| 2003 | 15                 | 12                | 21                   |
| 2004 | 8                  | 9                 | 22                   |
| 2005 | 7                  | 10                | 23                   |
| 2006 | 8                  | 12                | 21                   |
| 2007 | 5                  | 13                | 16                   |
| 2008 | 4                  | 16                | 20                   |
| 2009 | 4                  | 15                | 17                   |
| 2010 | 5                  | 10                | 17                   |
| 2011 | 2                  | 12                | 10                   |
| 2012 | 3                  | 10                | 12                   |
| 2013 | 2                  | 7                 | 10                   |
| 2014 | 4                  | 9                 | 7                    |
| 2015 | 3                  | 14                | 9                    |
| 2016 | 2                  | 13                | 7                    |
| 2017 | 3                  | 10                | 7                    |
| 2018 | 3                  | 9                 | 6                    |
| 2019 | 2                  | 12                | 6                    |

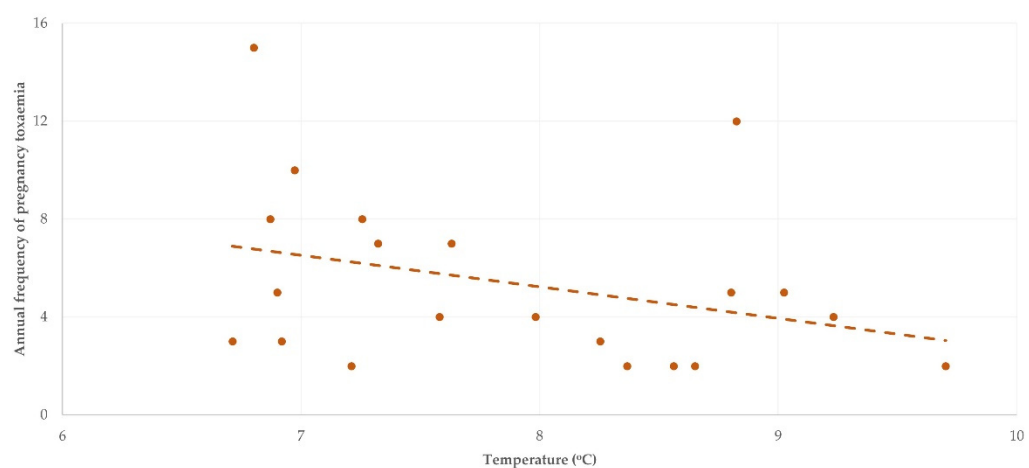

**Figure S7.** Scatterplot of annual average temperature at 2 m in the central part of Greece versus the annual frequency of cases of pregnancy toxemia attended at the Department of Obstetrics and Reproduction of the Veterinary Faculty of the University of Thessaly (dashed line is respective trendline;  $r = -0.326$ ,  $r = 0.07$ ).

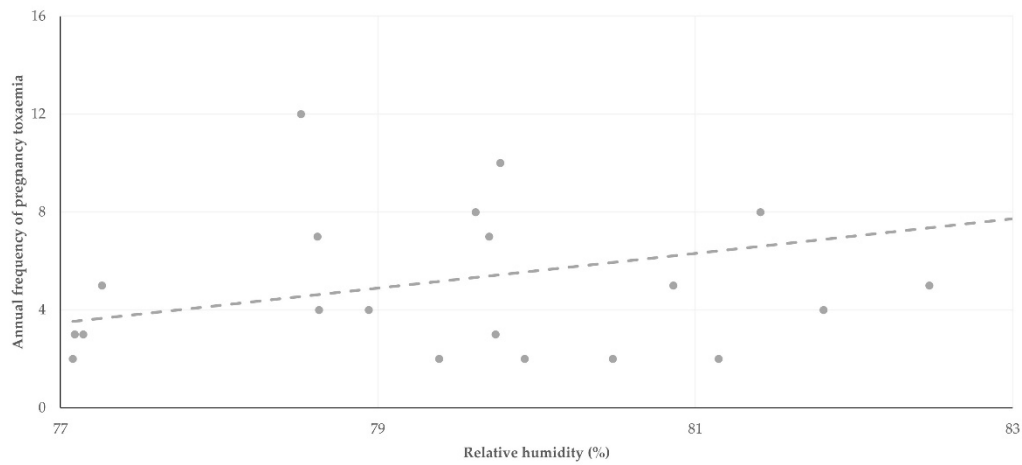

**Figure S8.** Scatterplot of annual average of relative humidity at 2 m in the central part of Greece versus the annual frequency of cases of pregnancy toxemia attended at the Department of Obstetrics and Reproduction of the Veterinary Faculty of the University of Thessaly (dashed line is respective trendline;  $r = -0.359$ ,  $r = 0.06$ ).

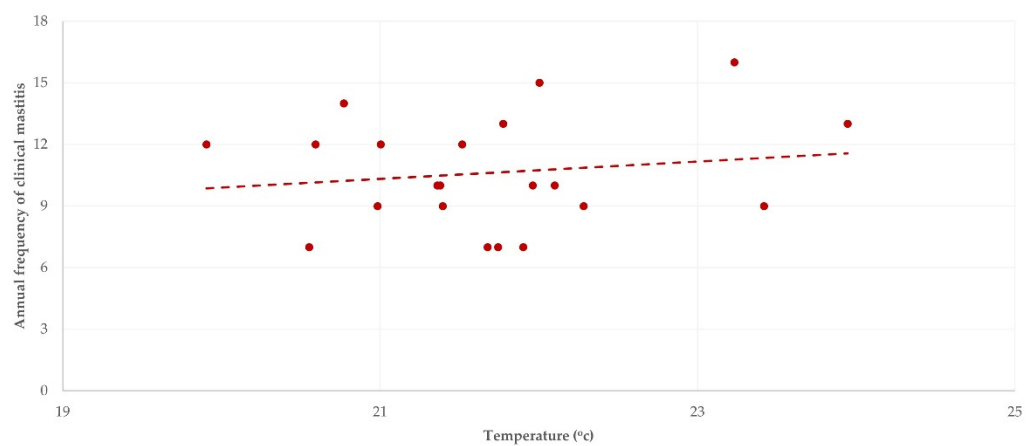

**Figure S9.** Scatterplot of annual average temperature at 2 m in the central part of Greece versus the annual frequency of cases of clinical mastitis attended at the Department of Obstetrics and Reproduction of the Veterinary Faculty of the University of Thessaly (dashed line is respective trendline  $r = -0.026$ ,  $r = 0.46$ ).

**Table S6.** Significance ( $p$  values) of the correlations between the annual frequency of cases of (a) pregnancy toxaemia, (b) clinical mastitis and (c) neonatal hypothermia attended at the Department of Obstetrics and Reproduction of the Veterinary Faculty of the University of Thessaly with the various climatic parameters that prevailed in the central part of Greece.

| <b>Climatic parameters</b>              | <b>Pregnancy Toxaemia</b> | <b>Clinical Mastitis</b> | <b>Neonatal Hypothermia</b> |
|-----------------------------------------|---------------------------|--------------------------|-----------------------------|
| Average temperature at 2 m (T2m)        | 0.07                      | 0.46                     | 0.039                       |
| Average temperature of earth skin (TS)  | 0.12                      | 0.47                     | 0.06                        |
| Minimum temperature at 2 m (T2mMin)     | 0.09                      | 0.36                     | 0.017                       |
| Maximum temperature at 2 m (T2mMax)     | 0.14                      | 0.25                     | 0.49                        |
| Temperature range at 2 m (T2mRan)       | 0.30                      | 0.41                     | 0.003                       |
| Average relative humidity at 2 m (RH2m) | 0.06                      | 0.46                     | 0.06                        |
| Average precipitation (PREC)            | 0.28                      | 0.49                     | 0.38                        |
| Average wind speed at 10 m (WS10m)      | 0.008                     | 0.29                     | 0.017                       |

**Table S7.** Annual (a) overall average epg counts in faecal samples from small ruminants, (b) overall average proportion of *Haemonchus contortus* larvae found in coprocultures of samples from small ruminants and (c) frequency of cases of *H. contortus* resistance in small ruminants, as detected at the Laboratory of Parasitology and Parasitic Diseases of the Faculty of Veterinary Medicine of the Aristotle University of Thessaloniki.

| Year<br>( <i>n</i> of samples tested) | Overall average epg counts in<br>faecal samples | Overall average proportion of<br><i>H. contortus</i> larvae found<br>in coprocultures | Frequency of cases of<br><i>H. contortus</i> resistance |
|---------------------------------------|-------------------------------------------------|---------------------------------------------------------------------------------------|---------------------------------------------------------|
| 1999 ( <i>n</i> = 859)                | 315                                             | 23.0%                                                                                 | 0                                                       |
| 2000 ( <i>n</i> = 1007)               | 340                                             | 23.5%                                                                                 | 0                                                       |
| 2001 ( <i>n</i> = 976)                | 327                                             | 25.7%                                                                                 | 0                                                       |
| 2002 ( <i>n</i> = 859)                | 328                                             | 25.0%                                                                                 | 0                                                       |
| 2003 ( <i>n</i> = 1116)               | 331                                             | 24.0%                                                                                 | 0                                                       |
| 2004 ( <i>n</i> = 956)                | 352                                             | 27.5%                                                                                 | 0                                                       |
| 2005 ( <i>n</i> = 859)                | 315                                             | 25.3%                                                                                 | 0                                                       |
| 2006 ( <i>n</i> = 1070)               | 325                                             | 27.6%                                                                                 | 0                                                       |
| 2007 ( <i>n</i> = 1165)               | 344                                             | 32.9%                                                                                 | 0                                                       |
| 2008 ( <i>n</i> = 975)                | 319                                             | 29.8%                                                                                 | 1                                                       |
| 2009 ( <i>n</i> = 1127)               | 332                                             | 30.8%                                                                                 | 1                                                       |
| 2010 ( <i>n</i> = 1261)               | 334                                             | 31.0%                                                                                 | 0                                                       |
| 2011 ( <i>n</i> = 1250)               | 356                                             | 34.2%                                                                                 | 1                                                       |
| 2012 ( <i>n</i> = 1090)               | 325                                             | 34.2%                                                                                 | 2                                                       |
| 2013 ( <i>n</i> = 1235)               | 328                                             | 35.8%                                                                                 | 2                                                       |
| 2014 ( <i>n</i> = 1256)               | 339                                             | 33.3%                                                                                 | 5                                                       |
| 2015 ( <i>n</i> = 1290)               | 319                                             | 38.5%                                                                                 | 8                                                       |
| 2016 ( <i>n</i> = 1165)               | 326                                             | 35.7%                                                                                 | 14                                                      |
| 2017 ( <i>n</i> = 1215)               | 321                                             | 39.4%                                                                                 | 15                                                      |
| 2018 ( <i>n</i> = 1266)               | 340                                             | 35.0%                                                                                 | 16                                                      |
| 2019 ( <i>n</i> = 1225)               | 321                                             | 39.0%                                                                                 | 19                                                      |

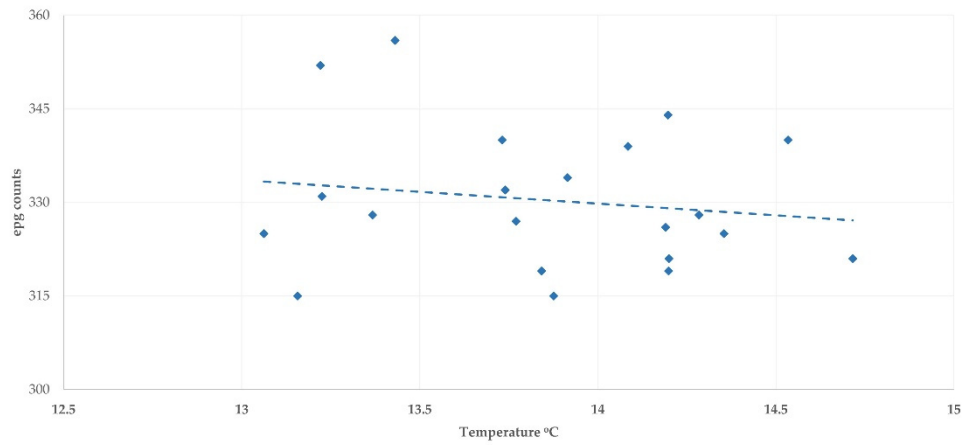

**Figure S10.** Scatterplot of annual average Earth skin temperature in the north part of Greece versus the annual average epg counts in faecal samples from small ruminants as reported by the Laboratory of Parasitology and Parasitic Diseases of the Faculty of Veterinary Medicine of the Aristotle University of Thessaloniki (dashed line is respective trendline;  $r = -0.157$ ,  $r = 0.25$ ).

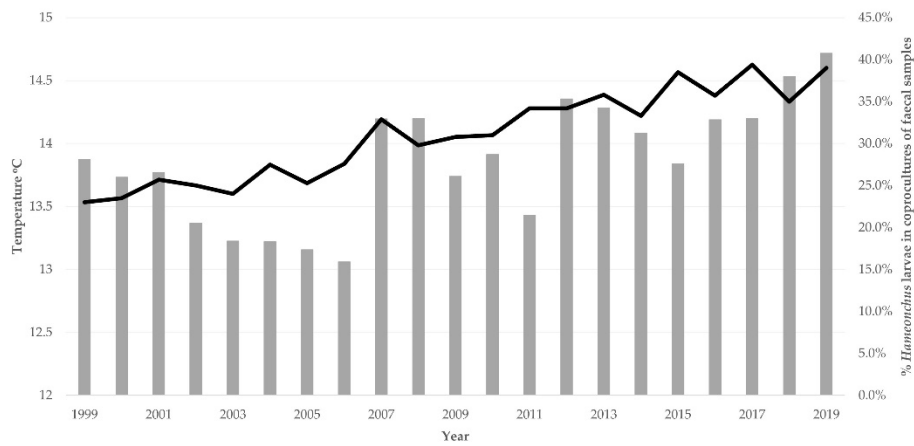

**Figure S11.** Annual average Earth skin temperature in the north part of Greece (grey bars) and annual average % of *Haemonchus contortus* larvae in coprocultures from faecal samples from small ruminants as reported by the Laboratory of Parasitology and Parasitic Diseases of the Faculty of Veterinary Medicine of the Aristotle University of Thessaloniki (black line), from 1999 to 2019.

**Table S8.** Significance (*p* values) of the correlations between (a) annual average epg counts in faecal samples, (b) annual average proportion of *Haemonchus contortus* larvae in coprocultures of faecal samples and (c) annual frequency of cases of *H. contortus* resistance as reported by the Laboratory of Parasitology and Parasitic Diseases of the Faculty of Veterinary Medicine of the Aristotle University of Thessaloniki with the various climatic parameters that prevailed in the north part of Greece.

| Climatic parameters                     | epg Counts in<br>Faecal Samples | % <i>H. contortus</i> Larvae in Copro-<br>cultures of Faecal Samples | Cases of <i>Haemo-<br/>nchus</i> Resistance |
|-----------------------------------------|---------------------------------|----------------------------------------------------------------------|---------------------------------------------|
| Average temperature at 2 m (T2m)        | 0.25                            | < 0.0001                                                             | 0.0003                                      |
| Average temperature of earth skin (TS)  | 0.25                            | 0.0004                                                               | 0.0007                                      |
| Minimum temperature at 2 m (T2mMin)     | 0.12                            | 0.11                                                                 | 0.39                                        |
| Maximum temperature at 2 m (T2mMax)     | 0.35                            | 0.29                                                                 | 0.11                                        |
| Temperature range at 2 m (T2mRan)       | 0.12                            | 0.09                                                                 | 0.20                                        |
| Average relative humidity at 2 m (RH2m) | 0.46                            | 0.26                                                                 | 0.24                                        |
| Average precipitation (PREC)            | 0.28                            | 0.29                                                                 | 0.40                                        |
| Average wind speed at 10 m (WS10m)      | 0.27                            | 0.07                                                                 | 0.23                                        |
